# Supplementary material for: Ammonia-storage in lithium intercalated fullerides
Source: Royal Society of Chemistry journal article supplement (doi:10.1039/c5ta05226b), 2015-01-01

## Ammonia-Storage in Lithium Intercalated Fullerides

### Electronic Supplementary Information

D. Pontiroli<sup>1</sup>, D. D'Alessio<sup>1</sup>, M. Gaboardi<sup>1</sup>, G. Magnani<sup>1</sup>, C. Milanese<sup>2</sup>, S. G. Duyker<sup>3,4</sup>,

V. Peterson<sup>3</sup>, N. Sharma<sup>5</sup> and M. Riccò<sup>1</sup>

*1 - Dipartimento di Fisica e Scienze della Terra, Università di Parma, Viale delle Scienze 7/a, 43124 Parma, Italy*

*2 - Pavia H<sub>2</sub> Lab, C.S.G.I & Dipartimento di Chimica, Sezione di Chimica Fisica, Università degli Studi di Pavia, V.le Taramelli 16, 27100 Pavia, Italy*

*3 - The Bragg Institute, Australian Nuclear Science and Technology Organisation, Locked Bag 2001, Kirrawee DC, NSW 2232, Australia*

*4 - School of Chemistry, The University of Sydney, Sydney, Australia*

*5 - School of Chemistry, University of New South Wales (UNSW), Sydney, Australia*

**Figure 1S:** Laboratory powder diffraction profile of  $\text{Li}_6\text{C}_{60}$  before and after the ammoniation stages. The powder diffraction of the pristine  $\text{Li}_6\text{C}_{60}$  sample is displayed at the bottom, showing the typical fcc arrangement. The crystal structure deeply change after treatment with ammonia (1<sup>st</sup> amm., hyper-ammoniated phase), where the first peak is significantly shifted towards smaller angles, confirming the occurrence of ammonia co-intercalation in the sample. After the complete ammonia desorption, the sample recover again a fcc packing (1<sup>st</sup> des.). A second treatment in ammonia brings again to a hyper-ammoniated phase, with improved crystallinity (2<sup>nd</sup> amm.). Asterisk indicates the presence of peak arising from Li amide.

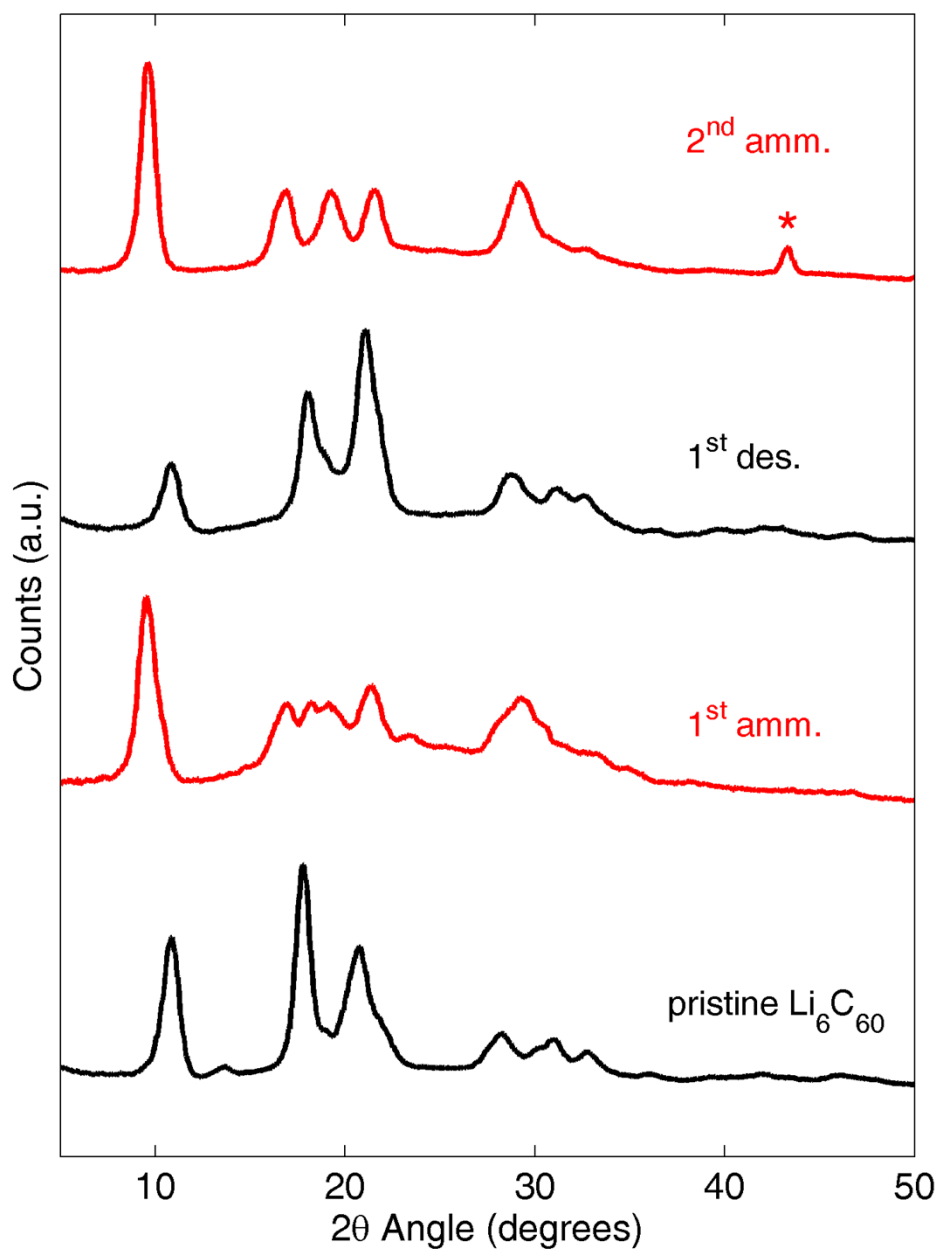

**Figure 2S:** Thermal evolution of the neutron powder diffraction profiles of  $(\text{ND}_3)_y\text{Li}_3\text{C}_{60}$  (left) and  $(\text{ND}_3)_y\text{Li}_{12}\text{C}_{60}$  (right) during in-situ measurements performed at WOMBAT in the temperature range 50-500K. Asterisks show peaks arising from Li amide.

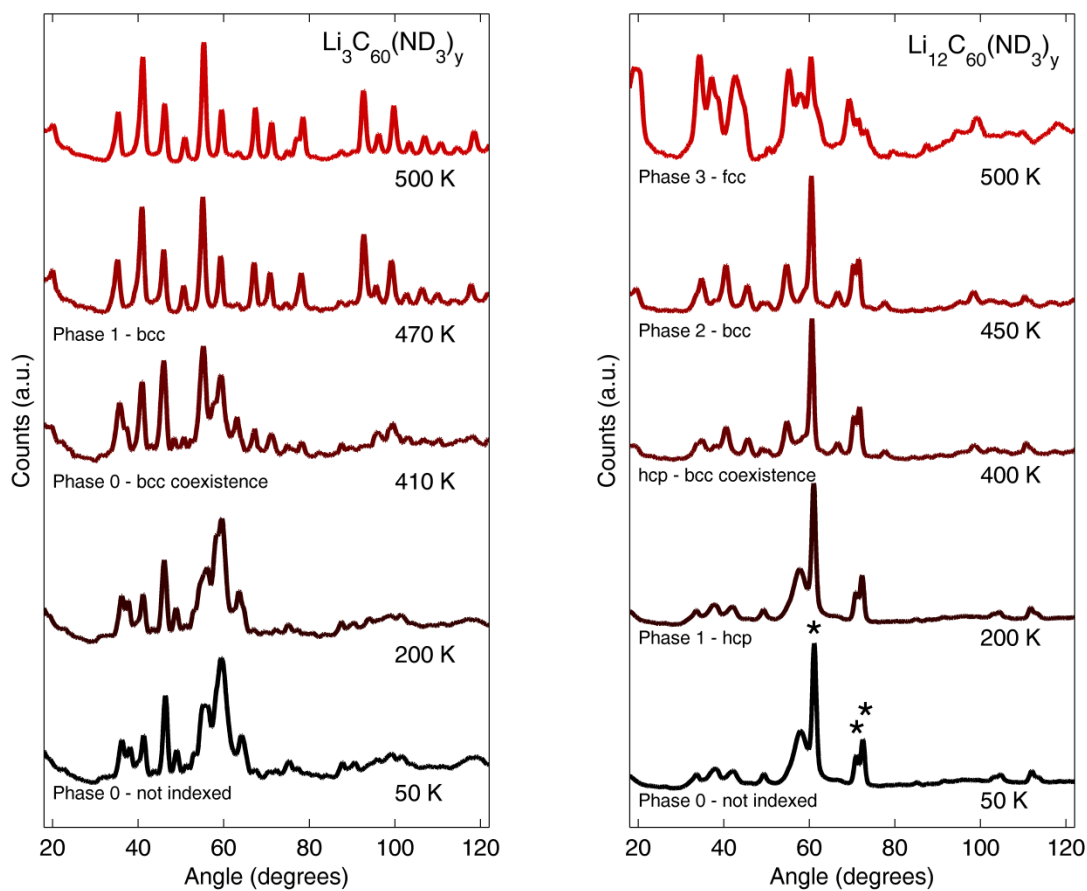

Supplement: c5ta05226b1.pdf [file c5ta05226b1.pdf]
